# Supplementary material for: Synthesis, characterization, molecular docking, and antimicrobial activities of dinuclear nickel(ii), palladium(ii), and platinum(iv) complexes
Source: Royal Society of Chemistry journal article supplement (doi:10.1039/d3ra04768g), 2023-01-01
Supplement: d3ra04768g1.pdf [file d3ra04768g1.pdf]

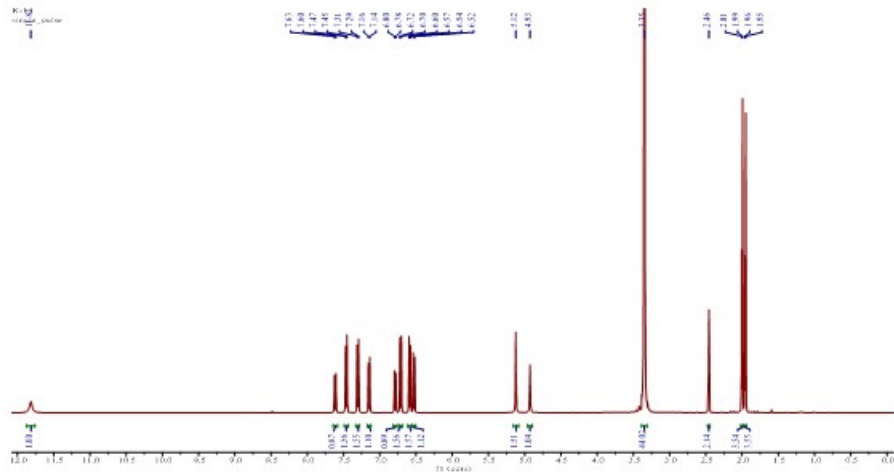

Figure. 1SI <sup>1</sup>H-NMR of (3Z, 2'E, 3'Z)-N<sub>2</sub>, N<sub>2'</sub>-biylbis (N<sub>3</sub>-hydroxybutane-2, 3-diimine)

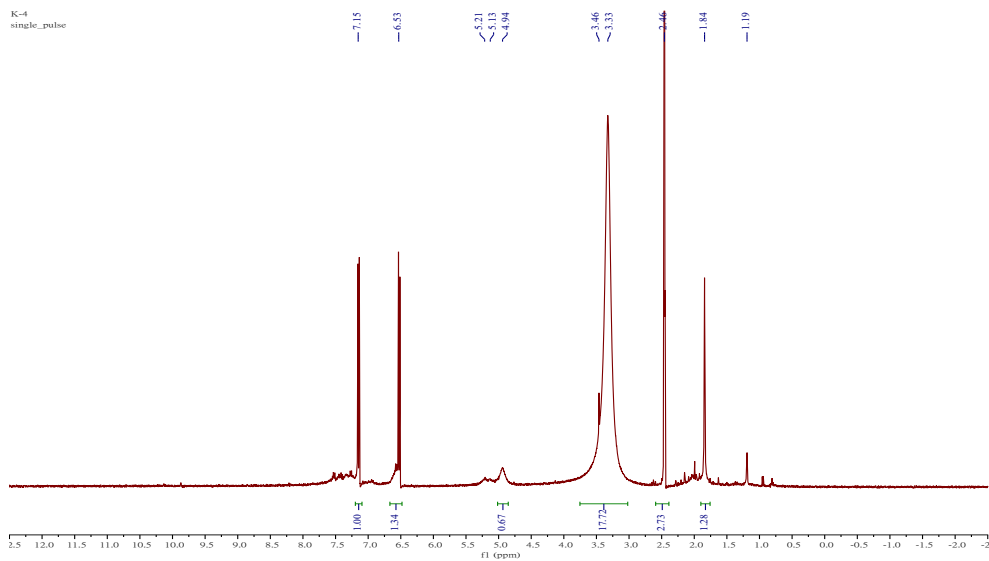

Figure. 2SI <sup>1</sup>H-NMR of bis-benzidinedioxime palladium II.

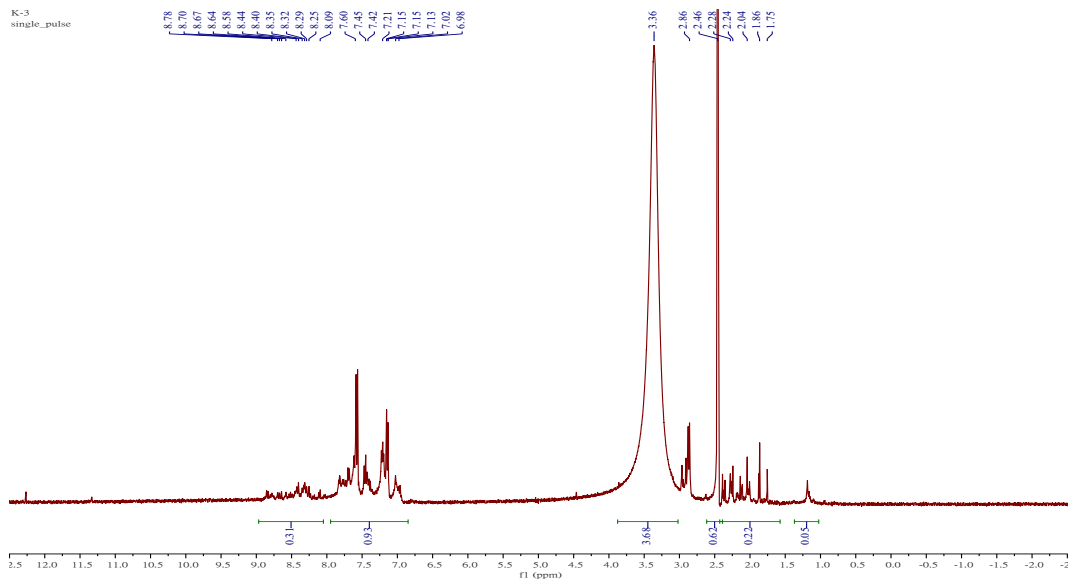

Figure. 3SI  $^1\text{H}$ -NMR of bis-benzidinedioxime Platinum(IV) .

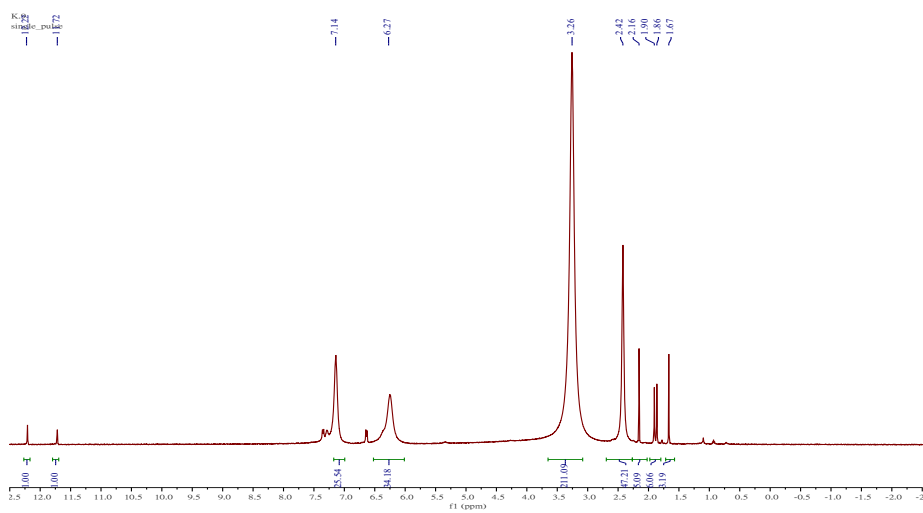

Figure. 4SI  $^1\text{H}$ -NMR of bis-benzidinedioxime nickel II.

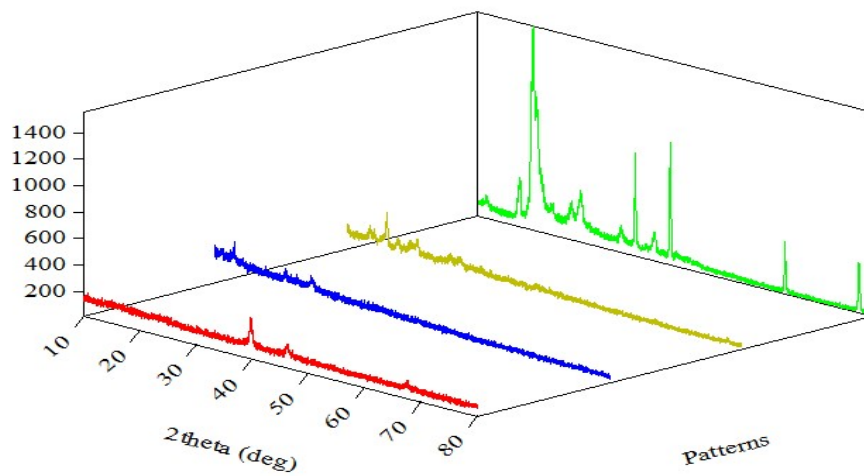

Figure. 5SI Illustrates analysis of PXRD spectrum of bis-benzidine dioxime and complexes, the green line is absorbed pattern of benzidinedioxime, the yellow line is absorbed pattern of bis-benzidinedioxime nickel II, the blue line is absorbed pattern of bis-benzidinedioxime Palladium(II) and red is absorbed pattern of bis-benzidinedioxime Platinum(IV) .

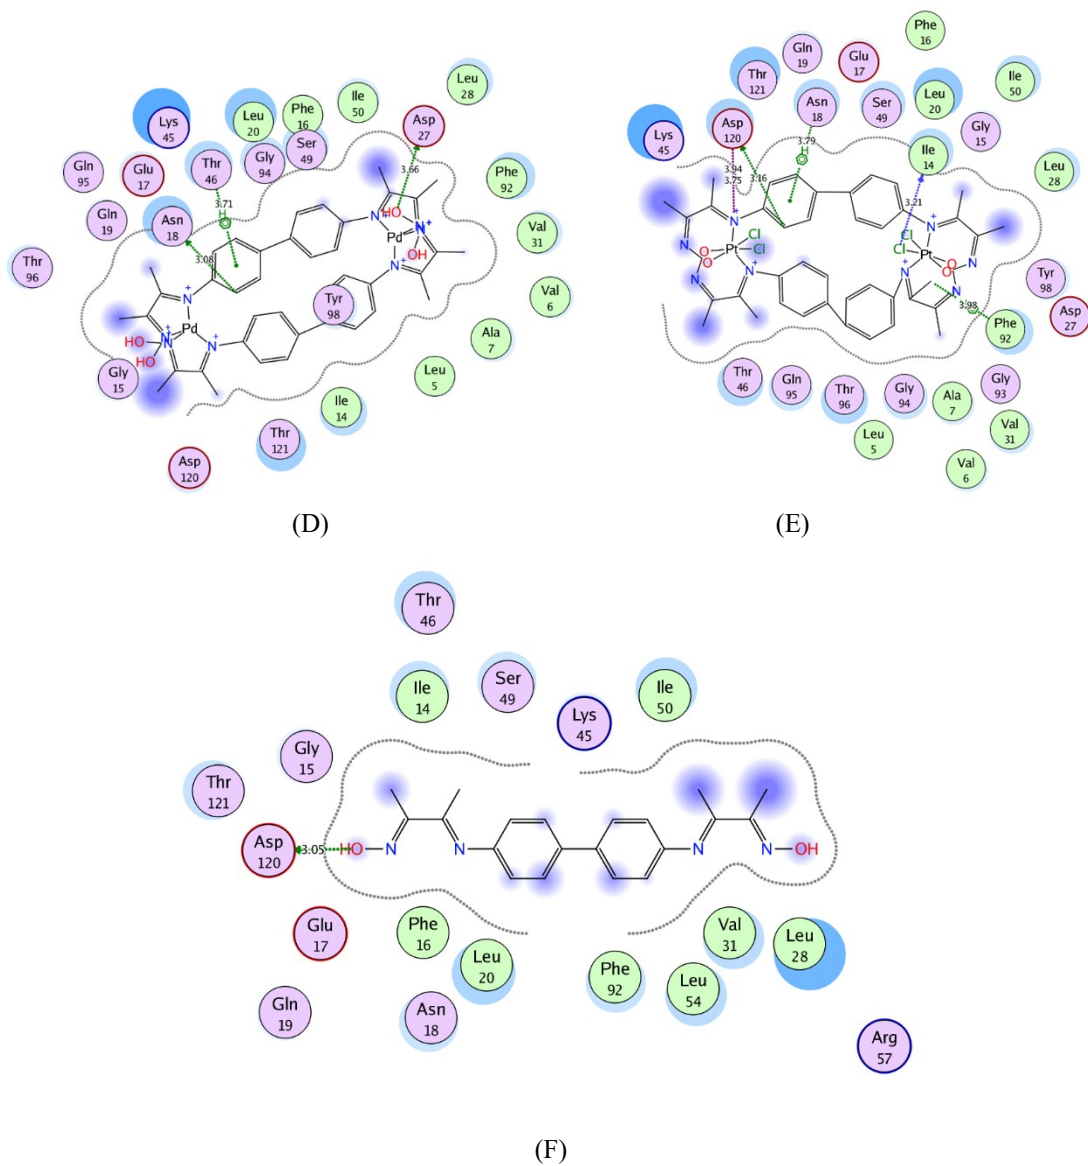

Figure. 6SI 2D interaction of benzidinedioxime and bis-benzidinedioxime complexes with DHFR pocket,  
 (D - F) 2D interaction of complex of palladium(II), platinum(IV), and benzidinedioxime with DHBR  
 pocket respectively

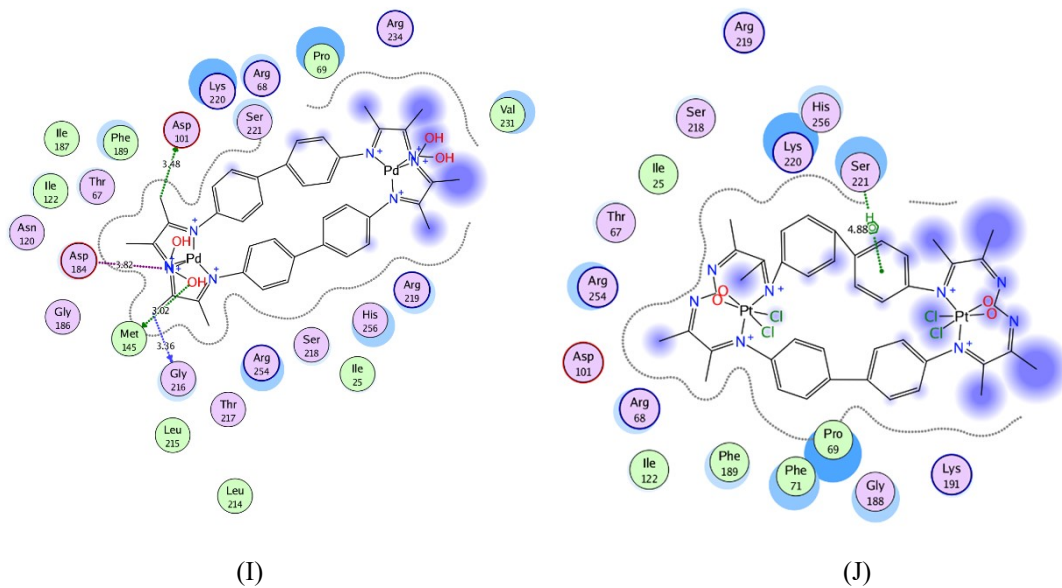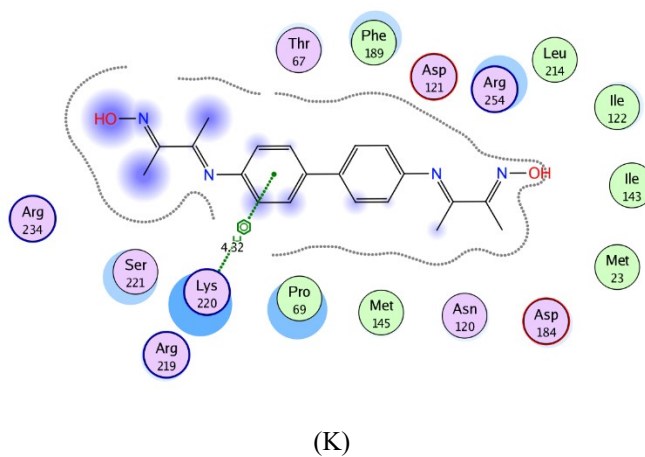

Figure. 7SI: 2D interaction of benzidinedioxime and bis-benzidinedioxime complexes with DHBS pocket, (I - K) 2D interaction of complex of palladium(II), platinum(IV), and benzidinedioxime with DHBR pocket respectively

Table 1SI Bonds distance of bis-benzidinedioxime nickel(II)

| Type | Atom 1 | Atom 2 | Distance | Type | Atom 1 | Atom 2 | Distance | Type | Atom 1 | Atom 2 | Distance |
|------|--------|--------|----------|------|--------|--------|----------|------|--------|--------|----------|
| C-C  | C1     | C2     | 1.41     | C-H  | C21    | H68    | 1.01     | C-N  | C40    | N41    | 1.31     |
| C-C  | C1     | C3     | 1.62     | C-H  | C21    | H69    | 1.11     | C-C  | C40    | C46    | 1.58     |
| C-H  | C1     | H59    | 1.12     | C-H  | C22    | H70    | 1.11     | N-O  | N41    | O51    | 1.34     |
| C-C  | C2     | C4     | 1.41     | C-H  | C22    | H71    | 1.11     | N-Ni | N41    | Ni53   | 1.89     |
| C-H  | C2     | H60    | 1.12     | C-H  | C22    | H72    | 1.11     | N-C  | N42    | C43    | 1.33     |
| C-C  | C3     | C5     | 1.45     | C-H  | C23    | H73    | 1.11     | N-Ni | N42    | Ni52   | 1.83     |
| C-N  | C3     | N13    | 1.37     | C-H  | C23    | H74    | 1.11     | C-C  | C43    | C44    | 1.48     |
| C-C  | C4     | C6     | 1.40     | C-H  | C23    | H75    | 1.11     | C-C  | C43    | C48    | 1.71     |
| C-C  | C4     | C7     | 1.60     | C-H  | C24    | H76    | 1.11     | C-N  | C44    | N45    | 1.31     |
| C-C  | C5     | C6     | 1.41     | C-H  | C24    | H77    | 1.11     | C-C  | C44    | C49    | 1.59     |
| C-H  | C5     | H61    | 1.05     | C-H  | C24    | H78    | 1.11     | N-O  | N45    | O50    | 1.35     |
| C-H  | C6     | H62    | 1.13     | O-H  | O25    | H79    | 1.03     | N-Ni | N45    | Ni52   | 1.82     |
| C-C  | C7     | C8     | 1.41     | C-C  | C26    | C27    | 1.41     | C-H  | C46    | H88    | 1.11     |
| C-C  | C7     | C9     | 1.40     | C-C  | C26    | C28    | 1.40     | C-H  | C46    | H89    | 1.11     |
| C-C  | C8     | C10    | 1.41     | C-H  | C26    | H80    | 1.13     | C-H  | C46    | H90    | 1.11     |
| C-H  | C8     | H63    | 1.12     | C-C  | C27    | C29    | 1.41     | C-H  | C47    | H91    | 1.11     |
| C-C  | C9     | C11    | 1.40     | C-H  | C27    | H81    | 1.12     | C-H  | C47    | H92    | 1.11     |

| Type | Atom 1 | Atom 2 | Distance | Type | Atom 1 | Atom 2 | Distance | Type | Atom 1 | Atom 2 | Distance |
|------|--------|--------|----------|------|--------|--------|----------|------|--------|--------|----------|
| C-C  | C10    | C12    | 1.40     | C-N  | C28    | N38    | 1.54     | C-H  | C48    | H94    | 1.09     |
| C-H  | C10    | H65    | 1.13     | C-C  | C29    | C31    | 1.40     | C-H  | C48    | H95    | 1.14     |
| C-C  | C11    | C12    | 1.39     | C-C  | C29    | C32    | 1.59     | C-H  | C48    | H96    | 0.98     |
| C-H  | C11    | H66    | 1.24     | C-C  | C30    | C31    | 1.40     | C-H  | C49    | H97    | 1.11     |
| C-N  | C12    | N17    | 1.54     | C-H  | C30    | H82    | 1.14     | C-H  | C49    | H98    | 1.11     |
| N-C  | N13    | C14    | 1.33     | C-H  | C31    | H83    | 1.12     | C-H  | C49    | H99    | 1.11     |
| N-Ni | N13    | Ni52   | 1.83     | C-C  | C32    | C33    | 1.40     | O-H  | O50    | H100   | 1.02     |
| C-C  | C14    | C15    | 1.48     | C-C  | C32    | C34    | 1.41     | O-H  | O51    | H101   | 1.03     |
| C-C  | C14    | C22    | 1.58     | C-C  | C33    | C35    | 1.41     | Ni-O | Ni52   | O57    | 1.86     |
| C-N  | C15    | N16    | 1.31     | C-H  | C33    | H84    | 1.13     | Ni-O | Ni52   | O58    | 1.86     |
| C-C  | C15    | C21    | 1.59     | C-C  | C34    | C36    | 1.41     | Ni-O | Ni53   | O54    | 1.86     |
| N-Ni | N16    | Ni52   | 1.82     | C-H  | C34    | H85    | 1.12     | Ni-O | Ni53   | O55    | 1.86     |
| N-O  | N16    | O56    | 1.39     | C-C  | C35    | C37    | 1.40     | O-H  | O54    | H102   | 1.02     |
| N-C  | N17    | C18    | 1.32     | C-H  | C35    | H86    | 1.13     | O-H  | O54    | H103   | 1.02     |
| N-Ni | N17    | Ni53   | 1.91     | C-C  | C36    | C37    | 1.39     | O-H  | O55    | H104   | 1.02     |
| C-C  | C18    | C19    | 1.51     | C-H  | C36    | H87    | 1.12     | O-H  | O55    | H105   | 1.02     |
| C-C  | C18    | C23    | 1.59     | C-N  | C37    | N42    | 1.56     | O-H  | O56    | H106   | 1.02     |
| C-N  | C19    | N20    | 1.32     | N-C  | N38    | C39    | 1.32     | O-H  | O57    | H107   | 1.02     |
| C-C  | C19    | C24    | 1.57     | N-Ni | N38    | Ni53   | 1.91     | O-H  | O57    | H108   | 1.02     |
| N-O  | N20    | O25    | 1.35     | C-C  | C39    | C40    | 1.50     | O-H  | O58    | H109   | 1.02     |
| N-Ni | N20    | Ni53   | 1.89     | C-C  | C39    | C47    | 1.58     | O-H  | O58    | H110   | 1.02     |





| Type        | Angle  | Type         | Angle  | Type         | Angle  | Type         | Angle  |
|-------------|--------|--------------|--------|--------------|--------|--------------|--------|
| C2-C1-C3    | 124.51 | N16-C15-C21  | 122.43 | C28-C26-H80  | 118.02 | C40-C46-H90  | 110.15 |
| C2-C1-H59   | 120.29 | C15-N16-Ni52 | 116.54 | C26-C28-C30  | 118.39 | O51-N41-Ni53 | 120.77 |
| C1-C2-C4    | 121.84 | C15-N16-O56  | 118.19 | C26-C28-N38  | 121.66 | N41-O51-H101 | 112.88 |
| C1-C2-H60   | 118.81 | C15-C21-H67  | 110.62 | C29-C27-H81  | 119.08 | N41-Ni53-O54 | 99.12  |
| C3-C1-H59   | 114.58 | C15-C21-H68  | 109.14 | C27-C29-C31  | 117.04 | N41-Ni53-O55 | 90.41  |
| C1-C3-C5    | 102.26 | C15-C21-H69  | 115.73 | C27-C29-C32  | 122.77 | C43-N42-Ni52 | 115.17 |
| C1-C3-N13   | 121.12 | Ni52-N16-O56 | 125.01 | C30-C28-N38  | 119.89 | N42-C43-C44  | 111.71 |
| C4-C2-H60   | 119.35 | N16-Ni52-N42 | 160.31 | C28-C30-C31  | 120.84 | N42-C43-C48  | 124.54 |
| C2-C4-C6    | 116.96 | N16-Ni52-N5  | 88.99  | C28-C30-H82  | 127.91 | N42-Ni52-N45 | 83.8   |
| C2-C4-C7    | 121.33 | N16-Ni52-O57 | 85.83  | C28-N38-C39  | 120    | N42-Ni52-O57 | 77.69  |
| C5-C3-N13   | 128.12 | N16-Ni52-O58 | 101.76 | C28-N38-Ni53 | 124.83 | N52-Ni52-O58 | 96     |
| C3-C5-C6    | 130.54 | N16-O56-H106 | 116.51 | C31-C29-C32  | 120.18 | C44-C43-C48  | 123.49 |
| C3-C5-H61   | 119.36 | C18-N17-Ni53 | 115.37 | C29-C31-C30  | 121.87 | C43-C44-N45  | 110.91 |
| C3-N13-C14  | 123.9  | N17-C18-C19  | 112.63 | C29-C31-H83  | 119.77 | C43-C44-C49  | 123.9  |
| C3-N13-Ni52 | 120.07 | N17-C18-C23  | 123.67 | C29-C32-C33  | 121.52 | C43-C48-H94  | 103.36 |
| C6-C4-C7    | 121.68 | N17-Ni53-N20 | 82.8   | C29-C33-C34  | 121.34 | C43-C48-H95  | 103.1  |
| C4-C6-C5    | 120.97 | N17-Ni53-N38 | 111.98 | C31-C30-H82  | 110.17 | C43-C48-H96  | 109.83 |
| C4-C6-H62   | 119.38 | N17-Ni53-N41 | 162.69 | C30-C31-H83  | 118.36 | N45-C44-C49  | 125.03 |
| C4-C7-C8    | 122.97 | N17-Ni53-O54 | 92.76  | C33-C32-C34  | 117.13 | C44-N45-O50  | 119.81 |
| C4-C7-C9    | 120.09 | N17-Ni53-O55 | 79.98  | C32-C33-C35  | 121    | C44-N45-Ni52 | 117.26 |
| C6-C5-H61   | 108.88 | C18-C19-C23  | 123.66 | C32-C33-H84  | 119.32 | C44-C49-H97  | 110.09 |
| C5-C6-H62   | 119.65 | C18-C19-N20  | 111.99 | C32-C34-C36  | 121.6  | C44-C49-H98  | 109.64 |

Table 2SI Bond angles of bis-benzidinedioxime of nickel(II)



| Type         | Angle  | Type         | Angle  | Type         | Angle  | Type          | Angle  |
|--------------|--------|--------------|--------|--------------|--------|---------------|--------|
| C8-C7-C9     | 116.93 | C18-C19-C24  | 124.23 | C32-C34-H85  | 119.43 | C44-C49-H99   | 116.82 |
| C7-C8-C18    | 120.98 | C18-C23-H73  | 113.53 | C35-C33-H84  | 119.68 | O50-N45-Ni52  | 122.88 |
| C7-C8-H63    | 119.1  | C18-C23-H74  | 109.61 | C33-C35-C37  | 121.41 | N45-O50-H100  | 115.89 |
| C7-C9-C11    | 121.89 | C18-C23-H75  | 113.28 | C33-C35-H86  | 120.37 | N45-Ni52-O57  | 101.27 |
| C7-C9-H64    | 119.74 | N20-C19-C24  | 123.76 | C36-C34-H85  | 118.96 | N45-Ni52-O58  | 85.96  |
| C10-C8-H63   | 119.92 | C19-N20-O25  | 123.13 | C34-C36-C37  | 120.99 | H88-C46-H89   | 104.4  |
| C8-C10-C12   | 120.89 | C19-N20-Ni53 | 116.62 | C34-C36-H87  | 119.99 | H88-C46-H90   | 108.33 |
| C8-C10-H65   | 121.07 | C19-C24-H76  | 110.44 | C37-C35-H86  | 118.22 | H89-C46-H90   | 108.58 |
| C11-C9-H64   | 118.37 | C19-C24-H77  | 109.85 | C35-C37-C36  | 117.74 | H91-C47-H92   | 109.68 |
| C9-C11-C12   | 120.89 | C19-C24-H78  | 114.68 | C35-C37-N42  | 118.41 | H91-C47-H93   | 106.56 |
| C9-C11-H66   | 123.84 | O25-N20-Ni53 | 120.25 | C37-C36-H87  | 119.02 | H92-C47-H93   | 104.46 |
| C12-C10-H65  | 118.04 | N20-O25-H79  | 113.06 | C36-C37-N42  | 123.79 | H94-C48-H95   | 102.79 |
| C10-C12-C11  | 118.35 | N20-Ni53-N38 | 162.24 | C37-N42-C43  | 117.44 | H94-C48-H96   | 119.35 |
| C10-C12-N17  | 121.86 | N20-Ni53-N41 | 84.57  | C37-N42-Ni52 | 127.38 | H95-C48-H96   | 116.49 |
| C12-C11-H66  | 114.89 | N20-Ni53-O54 | 90.28  | C39-N38-Ni53 | 115.11 | H97-C49-H98   | 110.11 |
| C11-C12-N17  | 119.73 | N20-Ni53-O55 | 99.15  | N38-C39-C40  | 112.84 | H97-C49-H99   | 104.25 |
| C12-N17-C18  | 119.47 | H67-C21-H68  | 96.47  | N38-C39-C47  | 125.05 | H98-C49-H99   | 105.67 |
| C12-N17-Ni53 | 125.01 | H67-C21-H69  | 104.32 | N38-Ni53-N41 | 82.72  | O57-Ni52-O58  | 169.69 |
| C14-N13-Ni52 | 115.17 | H68-C21-H69  | 118.5  | N38-Ni53-O54 | 79.57  | Ni52-O57-H107 | 117.65 |
| N13-C14-C15  | 111.54 | H70-C22-H71  | 110.96 | N38-Ni53-O55 | 93.32  | Ni52-O57-H108 | 118.45 |

| Type         | Angle  | Type        | Angle  | Type         | Angle  | Type          | Angle  |
|--------------|--------|-------------|--------|--------------|--------|---------------|--------|
| N13-C14-C22  | 125.62 | H70-C22-H72 | 106.19 | C40-C39-C47  | 122.05 | Ni52-O58-H109 | 118    |
| N13-Ni52-N16 | 84.25  | H71-C22-H72 | 103.93 | C39-C40-N41  | 112.06 | Ni52-O58-H110 | 118.8  |
| N13-Ni52-N2  | 108.05 | H73-C23-H74 | 109.04 | C39-C40-C46  | 124.39 | O54-Ni53-O55  | 167.21 |
| N13-Ni52-N45 | 160.5  | H73-C23-H75 | 103.26 | C39-C47-H91  | 110.05 | N53i-O54-H102 | 115.33 |
| N13-Ni52-O57 | 96.48  | H74-C23-H75 | 107.8  | C39-C47-H92  | 110.87 | Ni53-O54-H103 | 116.44 |
| N13-Ni52-O58 | 77.58  | H76-C24-H77 | 110.58 | C39-C47-H93  | 114.95 | Ni53-O55-H104 | 116.25 |
| C15-C14-C22  | 122.81 | H76-C24-H78 | 106.09 | N41-C40-C46  | 123.52 | Ni53-O55-H105 | 115.28 |
| C14-C15-N16  | 111.24 | H77-C24-H78 | 105.03 | C40-N41-O51  | 122.72 | H102-O54-H103 | 106.08 |
| C14-C15-C21  | 126.17 | C27-C26-C28 | 120.89 | C40-N41-Ni53 | 116.5  | H104-O55-H105 | 106.64 |
| C14-C22-H70  | 110.65 | C27-C26-H80 | 121.09 | C40-C46-H88  | 112.08 | H107-O57-H108 | 110.22 |
| C14-C22-H71  | 109.4  | C26-C27-C29 | 120.91 | C40-C46-H89  | 113.04 | H109-O58-H110 | 110.23 |
| C14-C22-H72  | 115.51 | C26-C27-H81 | 120.01 |              |        |               |        |

Table 3SI Bonds distance of bis-benzidinedioxime palladium(II)

| Type | Atom 1 | Atom 2 | Distance | Type | Atom 1 | Atom 2 | Distance | Type | Atom 1 | Atom 2 | Distance |
|------|--------|--------|----------|------|--------|--------|----------|------|--------|--------|----------|
| C-C  | C1     | C2     | 1.3971   | C-N  | C20    | N22    | 1.30467  | C-C  | C36    | C38    | 1.3955   |
| C-C  | C1     | C3     | 1.39461  | C-C  | C20    | C23    | 1.58557  | C-H  | C36    | H83    | 1.1267   |
| C-H  | C1     | H55    | 1.13005  | O-N  | O21    | N22    | 1.34211  | C-C  | C37    | C38    | 1.3919   |
| C-C  | C2     | C4     | 1.39792  | O-H  | O21    | H64    | 1.02614  | C-H  | C37    | H84    | 1.1322   |
| C-H  | C2     | H56    | 1.12017  | N-Pd | N22    | Pd53   | 1.76112  | C-N  | C38    | N39    | 1.5193   |
| C-C  | C3     | C5     | 1.398    | C-H  | C23    | H65    | 1.11305  | N-C  | N39    | C40    | 1.3357   |
| C-N  | C3     | N18    | 1.52322  | C-H  | C23    | H66    | 1.11024  | N-Pd | N39    | Pd53   | 1.8124   |
| C-C  | C4     | C6     | 1.40069  | C-H  | C23    | H67    | 1.10953  | C-C  | C40    | C42    | 1.484    |
| C-C  | C4     | C7     | 1.56481  | C-H  | C24    | H68    | 1.11038  | C-C  | C40    | C51    | 1.5957   |
| C-C  | C5     | C6     | 1.41167  | C-H  | C24    | H69    | 1.11088  | O-N  | O41    | N43    | 1.3426   |
| C-H  | C5     | H57    | 1.12516  | C-H  | C24    | H70    | 1.10928  | O-H  | O41    | H85    | 1.0267   |
| C-H  | C6     | H58    | 1.12613  | C-H  | C25    | H71    | 1.11276  | C-N  | C42    | N43    | 1.3049   |
| C-C  | C7     | C8     | 1.40405  | C-H  | C25    | H72    | 1.11437  | C-C  | C42    | C52    | 1.5796   |
| C-C  | C7     | C9     | 1.39218  | C-H  | C25    | H73    | 1.1093   | N-Pd | N43    | Pd53   | 1.7718   |
| C-C  | C8     | C10    | 1.41351  | C-H  | C26    | H74    | 1.11296  | N-C  | N44    | C45    | 1.3319   |
| C-H  | C8     | H59    | 1.12291  | C-H  | C26    | H75    | 1.11006  | N-Pd | N44    | Pd54   | 2.0315   |
| C-C  | C9     | C11    | 1.38971  | C-H  | C26    | H76    | 1.11254  | C-C  | C45    | C46    | 1.5804   |
| C-H  | C9     | H60    | 1.10466  | C-C  | C27    | C28    | 1.41353  | C-C  | C45    | C50    | 1.5802   |
| C-C  | C10    | C12    | 1.39805  | C-C  | C27    | C29    | 1.39638  | C-N  | C46    | N48    | 1.3243   |



Table 4SI Bond angles of bis-benzidinedioxime palladium(II)

| Type        | Angle  | Type         | Angle  | Type         | Angle  | Type         | Angle  |
|-------------|--------|--------------|--------|--------------|--------|--------------|--------|
| C2-C1-C3    | 120.04 | C8-C7-C9     | 118.35 | N13-Pd54-N44 | 125.74 | N18-Pd53-N39 | 91.64  |
| C2-C1-H55   | 121.1  | C7-C8-C10    | 120    | N13-Pd54-N48 | 127.76 | N18-Pd53-N43 | 174.05 |
| C1-C2-C4    | 121.15 | C7-C8-H59    | 118.82 | C16-C14-C255 | 121.96 | C20-C19-C24  | 119.23 |
| C1-C2-H56   | 119.66 | C7-C9-C11    | 121.89 | C14-C16-N17  | 115.75 | C19-C20-N22  | 111.22 |
| C3-C1-H55   | 118.85 | C7-C9-H60    | 118.82 | C14-C16-C26  | 121.92 | C19-C20-C23  | 123.43 |
| C1-C3-C5    | 119.54 | C10-C8-H59   | 121.14 | C14-C25-H71  | 113.85 | C19-C24-H68  | 110.38 |
| C1-C3-N18   | 117.48 | C8-C10-C12   | 119.89 | C14-C25-H72  | 109.21 | C19-C24-H69  | 109.18 |
| C4-C2-H56   | 119.19 | C8-C10-H61   | 121.93 | C14-C25-H73  | 112.17 | C19-C24-H70  | 117.89 |
| C2-C4-C6    | 118.72 | C11-C9-H60   | 119.28 | N17-O15-H63  | 111.69 | N22-C20-C23  | 125.16 |
| C2-C4-C7    | 117.2  | C9-C11-C12   | 119.69 | O15-N17-C16  | 126.39 | C20-N22-O21  | 122.88 |
| C5-C3-N18   | 122.71 | C9-C11-H62   | 120.79 | O15-N17-Pd54 | 122.2  | C20-N22-Pd53 | 114.44 |
| C3-C5-C6    | 120.19 | C12-C10-H61  | 118.17 | N17-C16-C26  | 122.24 | C20-C23-H65  | 109.07 |
| C3-C5-H57   | 118.1  | C10-C12-C11  | 119.94 | C16-N17-Pd54 | 110.87 | C20-C23-H66  | 114.58 |
| C3-N18-C19  | 113.76 | C10-C12-N13  | 125.84 | C16-C26-H74  | 109.72 | C20-C23-H67  | 112.92 |
| C3-N18-Pd53 | 132.12 | C12-C11-H62  | 119.5  | C16-C26-H75  | 110.01 | N22-O21-H64  | 112.71 |
| C6-C4-C7    | 123.88 | C11-C12-N13  | 114.22 | C16-C26-H76  | 115.45 | O21-N22-Pd53 | 120.36 |
| C4-C6-C5    | 120.2  | C12-N13-C14  | 121.12 | N17-Pd54-N44 | 126.59 | N22-Pd53-N39 | 174.15 |
| C4-C6-H58   | 118.91 | C12-N13-Pd54 | 122.5  | N17-Pd54-N48 | 109.67 | N22-Pd53-N43 | 90.69  |
| C4-C7-C8    | 125.19 | C14-N13-Pd54 | 110.49 | C19-N18-Pd53 | 109.58 | H65-C23-H66  | 106.59 |
| C4-C7-C9    | 116.24 | N13-C14-C16  | 115.94 | N18-C19-C20  | 113.41 | H65-C23-H67  | 108.1  |
| C6-C5-H57   | 121.71 | N13-C14-C25  | 121.78 | N18-C19-C24  | 127.28 | H66-C23-H67  | 105.21 |
| C5-C6-H58   | 120.89 | N13-Pd54-N17 | 85.96  | N18-Pd53-N22 | 89.45  | H68-C24-H69  | 110.46 |

| Type        | Angle  | Type         | Angle  | Type         | Angle  | Type         | Angle  |
|-------------|--------|--------------|--------|--------------|--------|--------------|--------|
| H68-C24-H70 | 104.95 | C29-N44-Pd54 | 121.85 | C38-C37-H84  | 119.1  | C45-N44-Pd54 | 111.08 |
| H69-C24-H70 | 103.67 | C32-C30-C33  | 116.58 | C37-C38-N39  | 116.79 | N44-C45-C46  | 115.69 |
| H71-C25-H72 | 108.33 | C30-C32-C31  | 121.98 | C38-N39-C40  | 113.29 | N44-C45-C50  | 122.91 |
| H71-C25-H73 | 103.84 | C30-C32-H80  | 119.1  | C38-N39-Pd53 | 132.16 | N44-Pd54-N48 | 84.98  |
| H72-C25-H73 | 109.22 | C30-C33-C34  | 123.74 | C40-N39-Pd39 | 109.93 | C46-C45-C50  | 121.15 |
| H74-C26-H75 | 110.08 | C30-C33-C35  | 117.62 | N39-C40-C42  | 112.95 | C45-C46-N48  | 115.49 |
| H74-C26-H76 | 105.13 | C32-C31-H79  | 120.86 | N39-C40-C51  | 125.78 | C45-C46-C49  | 123.24 |
| H75-C26-H76 | 106.25 | C31-C32-H80  | 118.92 | N39-Pd53-N43 | 88.82  | C45-C50-H90  | 110.53 |
| C28-C27-C29 | 119.97 | C34-C33-C35  | 118.44 | C42-C40-C51  | 121.17 | C45-C50-H91  | 109.32 |
| C28-C27-H77 | 121.97 | C33-C34-C36  | 120.35 | C40-C42-N43  | 111.01 | C45-C50-H92  | 115.97 |
| C27-C28-C30 | 120.2  | C33-C34-H81  | 119.11 | C40-C2-C52   | 126.06 | N48-C46-C49  | 121.18 |
| C27-C28-H78 | 120.75 | C33-C35-C37  | 121.04 | C40-C51-H93  | 115.06 | C46-N48-O47  | 125.61 |
| C29-C27-H77 | 118.05 | C33-C35-H82  | 119.52 | C40-C51-H94  | 110.45 | C46-N48-Pd54 | 111.55 |
| C27-C29-C31 | 119.76 | C36-C34-H81  | 120.54 | C40-C51-H95  | 112.29 | C46-C49-H87  | 110.01 |
| C27-C29-N44 | 125.71 | C34-C36-C38  | 120    | N43-O41-H85  | 113.87 | C46-C49-H88  | 112.66 |
| C30-C28-H78 | 119.03 | C34-C36-H83  | 121.76 | O41-N-43C42  | 121.51 | C46-C49-H89  | 112.59 |
| C28-C30-C32 | 118.07 | C37-C35-H82  | 119.44 | O41-N43-Pd53 | 121.4  | N48-O47-H86  | 111.58 |
| C28-C30-C33 | 125.14 | C35-C37-C38  | 120.21 | N43-C42-C52  | 122.83 | O47-N48-Pd54 | 122.26 |
| C31-C29-N44 | 114.53 | C35-C37-H84  | 120.68 | C42-N43-Pd53 | 114.11 | H87-C49-H88  | 108.61 |
| C29-C31-C32 | 119.83 | C38-C36-H83  | 118.24 | C42-C52-H96  | 111.15 | H87-C49-H89  | 107.74 |
| C29-C31-H79 | 119.3  | C36-C38-C37  | 119.73 | C42-C52-H97  | 113.65 | H88-C49-H89  | 104.96 |
| C29-N44-C45 | 121.73 | C36-C38-N39  | 123.21 | C42-C52-H98  | 111.21 | H90-C50-H91  | 110.29 |



---

| Type        | Angle  | Type        | Angle  | Type        | Angle  | Type        | Angle  |
|-------------|--------|-------------|--------|-------------|--------|-------------|--------|
| H90-C50-H92 | 104.51 | H93-C51-H94 | 108.64 | H94-C51-H95 | 108.68 | H96-C52-H98 | 108.16 |
| H91-C50-H92 | 106.01 | H93-C51-H95 | 101.23 | H96-C52-H97 | 108.58 | H97-C52-H98 | 103.71 |

---

Table 5SI Bonds distance of bis-benzidinedioxime of platinum(IV)

| Type | Atom 1 | Atom 2 | Distance | Type | Atom 1 | Atom 2 | Distance | Type  | Atom 1 | Atom 2 | Distance |
|------|--------|--------|----------|------|--------|--------|----------|-------|--------|--------|----------|
| C-C  | C1     | C2     | 1.31623  | C-H  | C12    | H63    | 1.0736   | C-H   | C24    | H73    | 1.1308   |
| C-C  | C1     | C6     | 1.34595  | C-C  | C13    | C14    | 1.3743   | C-H   | C24    | H74    | 1.1011   |
| C-H  | C1     | H59    | 1.07414  | C-H  | C13    | H64    | 1.0606   | C-H   | C24    | H75    | 1.1026   |
| C-C  | C2     | C3     | 1.37877  | C-C  | C14    | C15    | 1.3918   | C-H   | C25    | H76    | 1.0774   |
| C-H  | C2     | H60    | 1.06702  | C-N  | C14    | N17    | 1.3347   | C-H   | C25    | H77    | 1.0827   |
| C-C  | C3     | C4     | 1.37551  | C-C  | C15    | C16    | 1.3247   | C-H   | C25    | H78    | 1.1301   |
| C-C  | C3     | C8     | 1.30072  | C-H  | C15    | H65    | 1.0771   | O-Pt  | O26    | Pt54   | 1.8685   |
| C-C  | C4     | C5     | 1.32825  | C-H  | C16    | H66    | 1.0563   | Pt-N  | Pt27   | N34    | 2.1544   |
| C-H  | C4     | H61    | 1.08839  | N-C  | N17    | C18    | 1.2612   | Pt-O  | Pt27   | O48    | 1.8577   |
| C-C  | C5     | C6     | 1.3946   | N-Pt | N17    | Pt54   | 2.0103   | Pt-Cl | Pt27   | Cl57   | 2.3947   |
| C-H  | C5     | H62    | 1.08513  | C-C  | C18    | C19    | 1.4966   | Pt-Cl | Pt27   | Cl58   | 2.3452   |
| C-N  | C6     | N7     | 1.28816  | C-C  | C18    | C24    | 1.5588   | C-C   | C28    | C29    | 1.335    |
| N-C  | N7     | C11    | 1.28951  | C-N  | C19    | N20    | 1.2872   | C-C   | C28    | C33    | 1.4321   |
| N-Pt | N7     | Pt27   | 1.93236  | C-C  | C19    | C25    | 1.5105   | C-H   | C28    | H79    | 1.0799   |
| C-C  | C8     | C12    | 1.35852  | N-O  | N20    | O26    | 1.2623   | C-C   | C29    | C30    | 1.3742   |
| C-C  | C8     | C16    | 1.36445  | O-Pt | O21    | Pt27   | 1.9296   | C-H   | C29    | H80    | 1.0886   |
| N-C  | N9     | C10    | 1.27976  | C-H  | C22    | H67    | 1.0958   | C-C   | C30    | C31    | 1.3581   |
| N-O  | N9     | O21    | 1.30618  | C-H  | C22    | H68    | 1.0938   | C-C   | C30    | C35    | 1.31     |
| C-C  | C10    | C11    | 1.45581  | C-H  | C22    | H69    | 1.0966   | C-C   | C31    | C32    | 1.2989   |
| C-C  | C10    | C22    | 1.46117  | C-H  | C23    | H70    | 1.0933   | C-H   | C31    | H81    | 1.0594   |
| C-C  | C11    | C23    | 1.49662  | C-H  | C23    | H71    | 1.0971   | C-C   | C32    | C33    | 1.3395   |
| C-C  | C12    | C13    | 1.31237  | C-H  | C23    | H72    | 1.0908   | C-H   | C32    | H82    | 1.0203   |



Table 6SI Bond angles of bis-benzidinedioxime platinum(IV)

| Type       | Angle  | Type         | Angle  | Type         | Angle  | Type          | Angle  |
|------------|--------|--------------|--------|--------------|--------|---------------|--------|
| C2-C1-C6   | 117.19 | C11-N7-Pt27  | 124.88 | C11-C23-H70  | 112.57 | N17-Pt54-Cl55 | 85.86  |
| C2-C1-H59  | 121.84 | N7-C11-C10   | 121.58 | C11-C23-H71  | 110.87 | N17-Pt54-Cl56 | 89.54  |
| C1-C2-C3   | 117.64 | N7-C11-C23   | 120.45 | C11-C23-H72  | 105.27 | C19-C18-C24   | 119.21 |
| C1-C2-H60  | 118.87 | N7-Pt27-O21  | 86.48  | C13-C12-H63  | 120.56 | C18-C19-N20   | 124.17 |
| C6-C1-H59  | 120.96 | N7-Pt27-N34  | 103.93 | C12-C13-C14  | 119.35 | C18-C19-C25   | 112.12 |
| C1-C6-C5   | 126.28 | N7-Pt27-O48  | 171.57 | C12-C13-H64  | 119.14 | C18-C24-H73   | 117.53 |
| C1-C6-N7   | 115.77 | N7-Pt27-Cl57 | 81.12  | C14-C13-H64  | 121.5  | C18-C24-H74   | 112.14 |
| C3-C2-H60  | 123.41 | N7-Pt27-Cl58 | 92.14  | C13-C14-C15  | 122.56 | C18-C24-H75   | 103.37 |
| C2-C3-C4   | 125.52 | C12-C8-C16   | 124.86 | C13-C14-N17  | 116.35 | N20-C19-C25   | 122.14 |
| C2-C3-C8   | 117.73 | C8-C12-C13   | 117.1  | C15-C14-N17  | 119.58 | C19-N20-O26   | 119.23 |
| C4-C3-C8   | 116.74 | C8-C12-H63   | 122.31 | C14-C15-C16  | 117.1  | C19-C25-H76   | 99.71  |
| C3-C4-C5   | 116.63 | C8-C16-C15   | 118.42 | C14-C15-H65  | 122.82 | C19-C25-H77   | 115.94 |
| C3-C4-H61  | 120.89 | C8-C16-H66   | 120.29 | C14-N17-C18  | 117.46 | C19-C25-H78   | 124.91 |
| C3-C8-C12  | 117.8  | C10-N9-O21   | 121.52 | C14-N17-Pt54 | 124.82 | N20-O26-Pt54  | 114.53 |
| C3-C8-C16  | 117.3  | N9-C10-C11   | 123.09 | C16-C15-H65  | 120.05 | O21-Pt27-N34  | 167.65 |
| C5-C4-H61  | 122.46 | N9-C10-C22   | 119.14 | C15-C16-H66  | 121.29 | O21-Pt27-O48  | 85.73  |
| C4-C5-C6   | 116.64 | N9-O21-Pt27  | 120.73 | C18-N17-Pt54 | 117.32 | O21-Pt27-Cl57 | 91.95  |
| C4-C5-H62  | 120.47 | C11-C10-C22  | 117.76 | N17-C18-C19  | 119.79 | O21-Pt27-Cl58 | 96.16  |
| C6-C5-H62  | 122.88 | C10-C11-C23  | 117.96 | N17-C18-C24  | 120.58 | H67-C22-H68   | 103.72 |
| C5-C6-N7   | 117.83 | C10-C22-H67  | 104.92 | N17-Pt54-O26 | 88.39  | H67-C22-H69   | 116.67 |
| C6-N7-C11  | 119.35 | C10-C22-H68  | 111.57 | N17-Pt54-N44 | 97.01  | H68-C22-H69   | 109.92 |
| C6-N7-Pt27 | 115.4  | C10-C22-H69  | 109.85 | N17-Pt54-O53 | 174.61 | H70-C23-H71   | 104.42 |

| Type           | Angle  | Type        | Angle  | Type        | Angle  | Type          | Angle  |
|----------------|--------|-------------|--------|-------------|--------|---------------|--------|
| H70-C23-H72    | 111.89 | C29-C28-H79 | 116.53 | C39-C35-C43 | 124.58 | C42-C41-N44   | 119.59 |
| H71-C23-H72    | 111.99 | C28-C29-C30 | 116.64 | C35-C39-C40 | 118.26 | C41-C42-C43   | 118.04 |
| H73-C24-H74    | 97.76  | C28-C29-H80 | 121.7  | C35-C39-H83 | 124.48 | C41-C42-H85   | 124.21 |
| H73-C24-H75    | 115.08 | C33-C28-H79 | 125    | C35-C43-C42 | 116.57 | C41-N44-C45   | 119.34 |
| H74-C24-H75    | 111.23 | C28-C33-C32 | 121.12 | C35-C43-H86 | 121.67 | C41-N44-Pt54  | 122.06 |
| H76-C25-H77    | 99.37  | C28-C33-N34 | 121.73 | C37-N36-O48 | 120.35 | C43-C42-H85   | 117.73 |
| H76-C25-H78    | 75.64  | C30-C29-H80 | 121.63 | N36-C37-C38 | 125.12 | C42-C43-H86   | 121.74 |
| H77-C25-H78    | 118.99 | C29-C30-C31 | 124.35 | N36-C37-C49 | 116.2  | C45-N44-Pt54  | 118.35 |
| O26-Pt54-N44   | 172.24 | C29-C30-C35 | 118.47 | C38-C37-C49 | 118.66 | N44-C45-C46   | 120.64 |
| O26-Pt54-O53   | 87.5   | C31-C30-C35 | 117.02 | C37-C38-C50 | 114.5  | N44-C45-C51   | 122.06 |
| O26-Pt54-CI55  | 92.58  | C30-C31-C32 | 118.8  | C37-C49-H87 | 102.6  | N44-Pt54-O53  | 86.75  |
| O26-Pt54-CI56  | 91.75  | C30-C31-H81 | 123.93 | C37-C49-H88 | 106.64 | N44-Pt54-CI55 | 82.3   |
| N34-Pt27-O48   | 83.45  | C30-C35-C39 | 115.69 | C37-C49-H89 | 110.63 | N44-Pt54-CI56 | 93.86  |
| N34-Pt27-CI57  | 83.27  | C30-C35-C43 | 119.7  | C38-C50-H90 | 119.9  | C46-C45-C51   | 117.2  |
| N34-Pt27-CI58  | 90.15  | C32-C31-H81 | 117.22 | C38-C50-H91 | 111.47 | C45-C46-N47   | 125.21 |
| Pt27-N34-C33   | 128.07 | C31-C32-C33 | 120.47 | C38-C50-H92 | 111.03 | C45-C46-C52   | 120.07 |
| Pt27-N34-C38   | 116.96 | C31-C32-H82 | 117.14 | C40-C39-H83 | 117.26 | C45-C51-H93   | 104.07 |
| O48-Pt27-CI57  | 95.91  | C33-C32-H82 | 122.37 | C39-C40-C41 | 119.93 | C45-C51-H94   | 113.36 |
| O48-Pt27-CI58  | 91.91  | C32-C33-N34 | 116.79 | C39-C40-H84 | 117.4  | C45-C51-H95   | 113.45 |
| Pt27-O48-N36   | 116.55 | C33-N34-C38 | 114.86 | C41-C40-H84 | 122.64 | N47-C46-C52   | 114.54 |
| CI57-Pt27-CI58 | 169.13 | N34-C38-C37 | 120.1  | C40-C41-C42 | 122.5  | C46-N47-O53   | 119.91 |
| C29-C28-C33    | 118.4  | N34-C38-C50 | 125.39 | C40-C41-N44 | 117.88 | C46-C52-H96   | 111.54 |

| Type         | Angle  | Type        | Angle  | Type        | Angle  | Type           | Angle  |
|--------------|--------|-------------|--------|-------------|--------|----------------|--------|
| C46-C52-H97  | 107.72 | H88-C49-H89 | 117.43 | H93-C51-H95 | 110.71 | H97-C52-H98    | 107.5  |
| C46-C52-H98  | 103.41 | H90-C50-H91 | 102.38 | H94-C51-H95 | 108.33 | O53-Pt54-CI55  | 90.85  |
| N47-O53-Pt54 | 118.68 | H90-C50-H92 | 107.23 | H96-C52-H97 | 109.21 | O53-Pt54-CI56  | 94.07  |
| H87-C49-H88  | 112.21 | H91-C50-H92 | 103.28 | H96-C52-H98 | 116.96 | CI55-Pt54-CI56 | 173.59 |
| H87-C49-H89  | 106.37 | H93-C51-H94 | 106.68 |             |        |                |        |
